# Supplementary material for: The Effects of Acupuncture at Real or Sham Acupoints on the Intrinsic Brain Activity in Mild Cognitive Impairment Patients
Source: Evid Based Complement Alternat Med. 2015 May 3;2015:529675. doi: 10.1155/2015/529675 (PMC4433670; doi:10.1155/2015/529675)

## **Supplementary materials**

**Figure S1 Two sample paired t-test shows statistical difference map of ALFF in the resting state between acupuncture at KI3 and no acupuncture in normal control group**

**Figure S2 Two sample paired t-test shows a statistical difference map of ALFF in the resting state between with acupuncture at sham acupoint and no acupuncture in normal control group**

**Figure S3 Two sample paired t-test shows a statistical difference map of ALFF in the resting state between acupuncture at KI3 and acupuncture at sham acupoint in normal control group**

**Table S1 The brain areas of ALFF signal change significantly in normal controls with acupuncture at KI3 compared with no acupuncture in the resting state**

| Volume | Anatomical area                          | BA | H | X    | Y     | Z    | Peak <i>t</i> value | Peak <i>P</i> value  |
|--------|------------------------------------------|----|---|------|-------|------|---------------------|----------------------|
| 4239   | paracentral lobule                       | 5  | R | 1.5  | -34.5 | 56.5 | -6.3376             | 2.6×10 <sup>-5</sup> |
| 756    | cuneus                                   | 19 | R | 19.5 | -88.5 | 26.5 | -4.2657             | 9.1×10 <sup>-4</sup> |
| 729    | parahippocampal gyrus(lentiform nucleus) |    | R | 16.5 | -1.5  | -6.5 | 4.6419              | 4.6×10 <sup>-4</sup> |

BA: Brodman area; H: hemisphere; X: X axis; Y: Y axis; Z: Z axis; L: left; R: right.

**Table S2** The brain areas of ALFF signal change significantly in normal controls with acupuncture at sham acupoint compared with no acupuncture in the resting state

| Volume | Anatomical area        | BA | H | X     | Y     | Z     | Peak <i>t</i> value | Peak <i>P</i> value  |
|--------|------------------------|----|---|-------|-------|-------|---------------------|----------------------|
| 4914   | cuneus                 | 19 | R | 16.5  | -88.5 | 23.5  | -6.499              | 3.0×10 <sup>-5</sup> |
| 1674   | paracentral lobule     | 4  | R | 4.5   | -37.5 | 62.5  | -4.9545             | 3.3×10 <sup>-4</sup> |
| 864    | anterior cingulate     | 24 | L | -7.5  | 31.5  | 14.5  | 8.0612              | 3.5×10 <sup>-6</sup> |
| 810    | parahippocampal gyrus  |    | L | -37.5 | -25.5 | -9.5  | 4.1217              | 1.4×10 <sup>-3</sup> |
| 648    | inferior frontal gyrus | 47 | R | 16.5  | 7.5   | -12.5 | 4.0115              | 1.7×10 <sup>-3</sup> |
| 567    | anterior cingulate     | 32 | L | -4.5  | 19.5  | -6.5  | 4.0575              | 1.6×10 <sup>-3</sup> |

BA: Brodman area; H: hemisphere; X: X axis; Y: Y axis; Z: Z axis; L: left; R: right.

**Table S3** The brain areas of ALFF signal change significantly in normal controls with acupuncture at KI3 compared with acupuncture at sham acupoint in the resting state

| Volume | Anatomical area    | BA       | H | X    | Y    | Z    | Peak <i>t</i> value | Peak <i>P</i> value  |
|--------|--------------------|----------|---|------|------|------|---------------------|----------------------|
| 540    | anterior cingulate | 24<br>32 | L | -1.5 | 28.5 | -6.5 | -3.7218             | 2.9×10 <sup>-3</sup> |

BA: Brodman area; H: hemisphere; X: X axis; Y: Y axis; Z: Z axis; L: left; R: right.

Figure S1

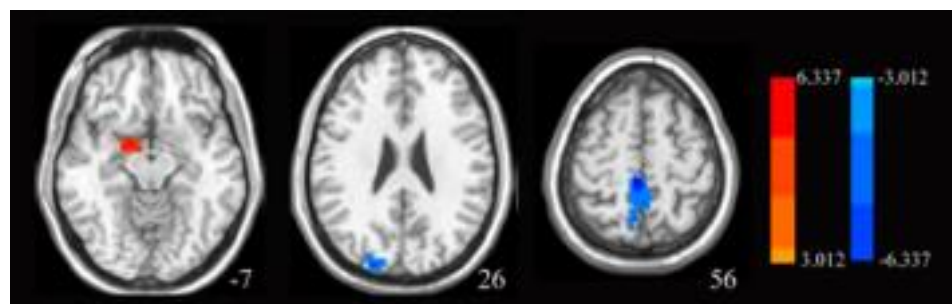

Figure S2

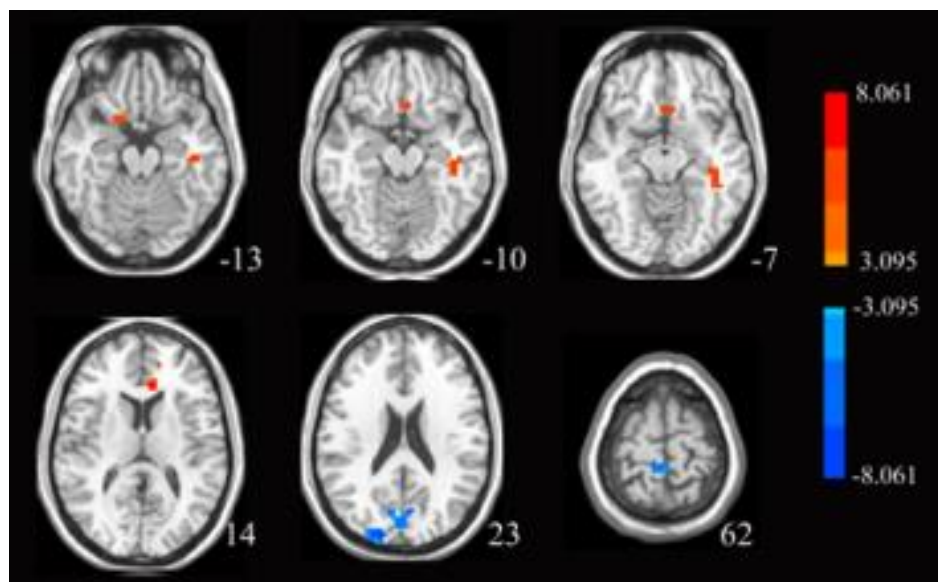

**Figure S3**

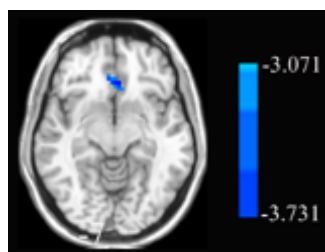

Supplement: Supplementary file 1 — In this supplementary material, three figures show statistical difference maps of ALFF in the resting state between acupuncture at KI3 and no acupuncture, or between with acupuncture at sham acupoint and no acupuncture or between acupuncture at KI3 and acupuncture at sham acupoint in normal control group. Three tables provide the changes in brain areas of ALFF signal in the rest state after acupuncture at KI3 or shame acupoint. [file 529675.f1.pdf]
